# Supplementary material
Source: Springer Nature journal article supplement (https://www.springermedizin.de/resource/supplementary/12984_2010_290_MOESM4_ESM.pdf/9605708)

- CVA Impaired
- CVA Unimpaired
- △ Controls Non-dominant
- ▲ Controls Dominant

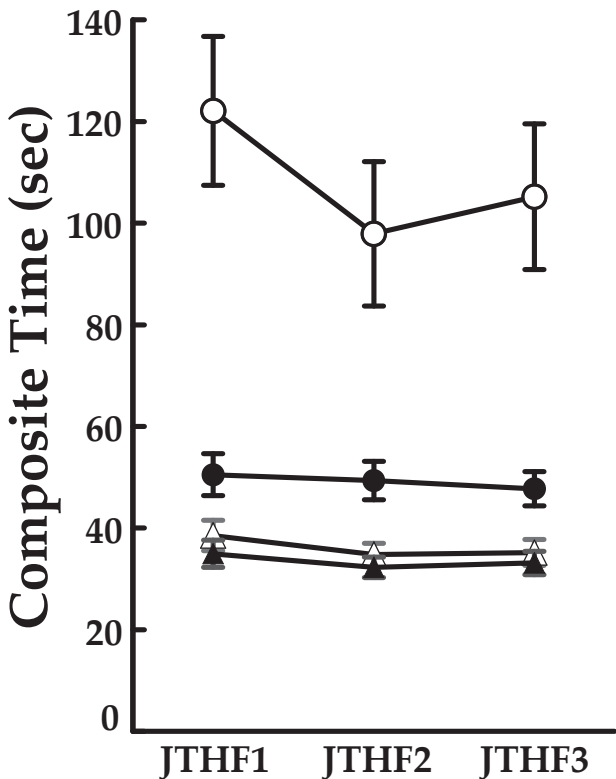

Supplement: MOESM4 [file 9605708]
